# Supplementary material for: On the role of residue phosphorylation in 14-3-3 partners: AANAT as a case study
Source: PubMed Central journal article supplement (PMC5384239; doi:10.1038/srep46114), 2017-04-07

Article title: “On the role of residue phosphorylation in 14-3-3 partners: AANAT as a case study”

Authors:

Diego Masone<sup>1,2</sup>; Marina Uhart<sup>1</sup> and Diego M. Bustos<sup>1,3,\*</sup>

Affiliations:

1 Instituto de Histología y Embriología (IHEM) - Consejo Nacional de Investigaciones Científicas y Técnicas (CONICET), CC56, Universidad Nacional de Cuyo (UNCuyo), 5500, Mendoza, Argentina.

2 Facultad de Ingeniería, Universidad Nacional de Cuyo (UNCuyo), Mendoza, Argentina.

3 Facultad de Ciencias Exactas y Naturales, Universidad Nacional de Cuyo (UNCuyo), Mendoza, Argentina.

\* [dbustos@mendoza-conicet.gob.ar](mailto:dbustos@mendoza-conicet.gob.ar)

Supplementary information

Legend

Results of the three independent simulations of full molecular dynamics process from initial structures, through pseudo-native to native complex.

a) Glu87 and Arg89 distance to groups 1 and 2 in 14-3-3 $\zeta$  (see the methods section).

The asterisk means simulation was performed with Thr31 in AANAT in its phosphorylated state

b) Normalized solvent accessible surface area (SASA) of the full protein-protein complex.

c) RMSD C $\alpha$  to native structure. Sections marked as I, II or III in the plots correspond to first harmonic potential applied (I), free simulation (II) and second harmonic potential applied (III)

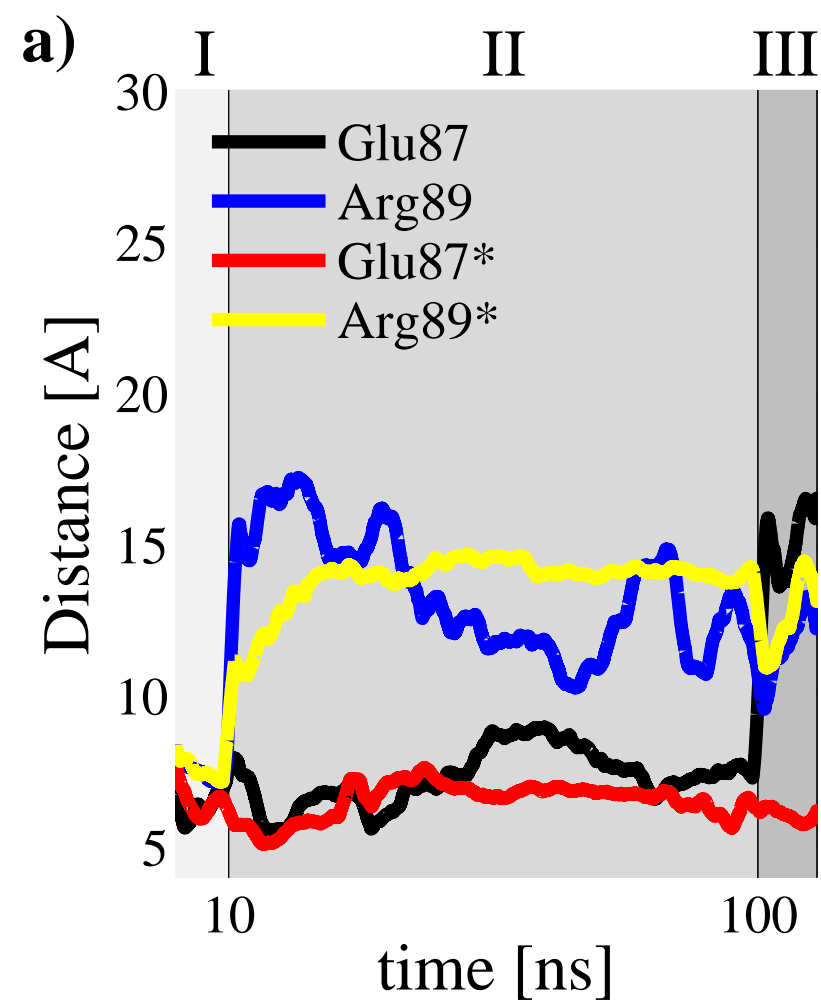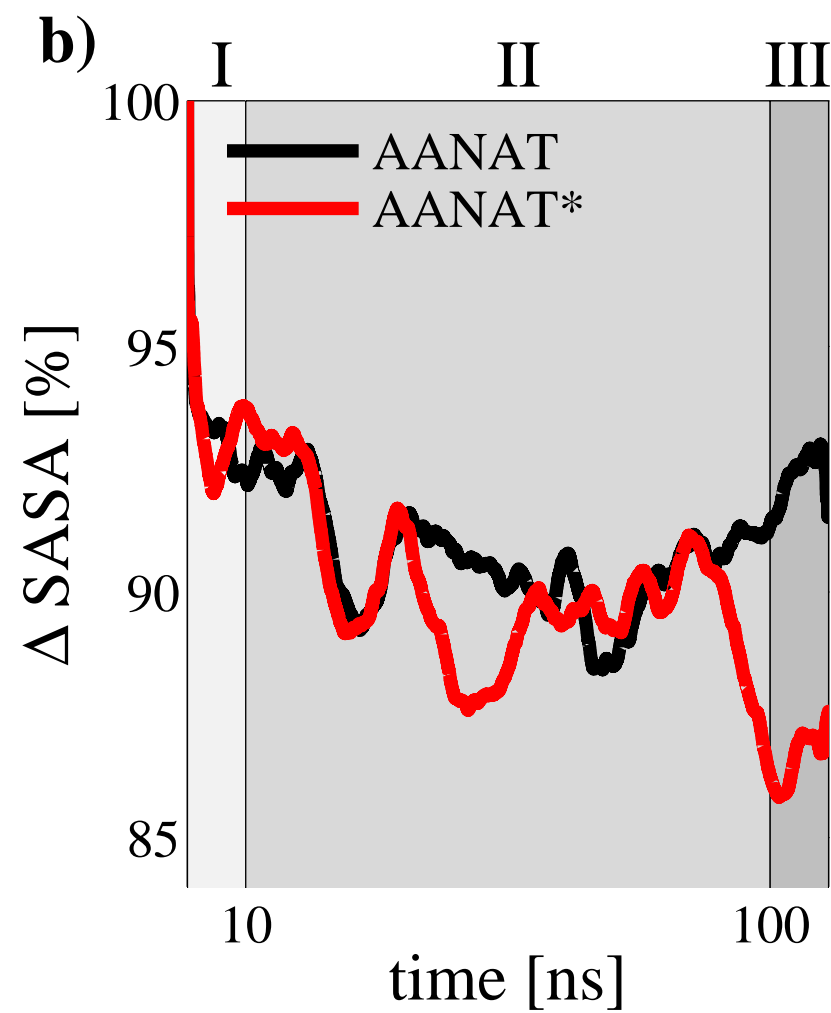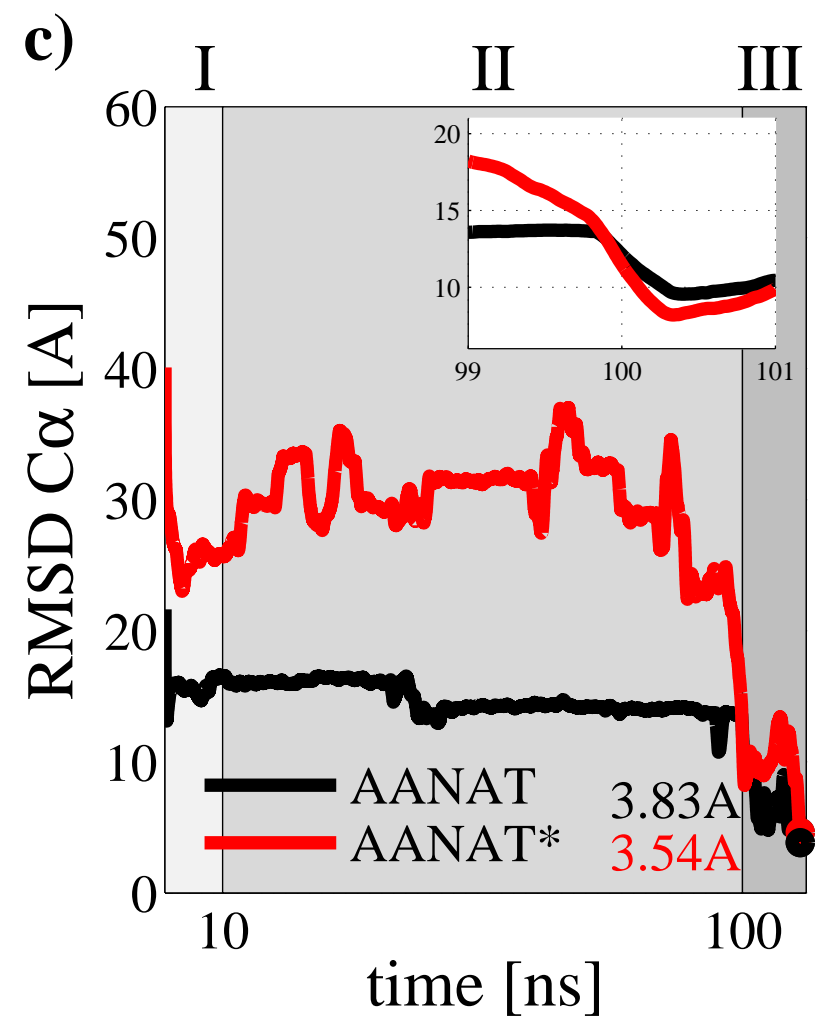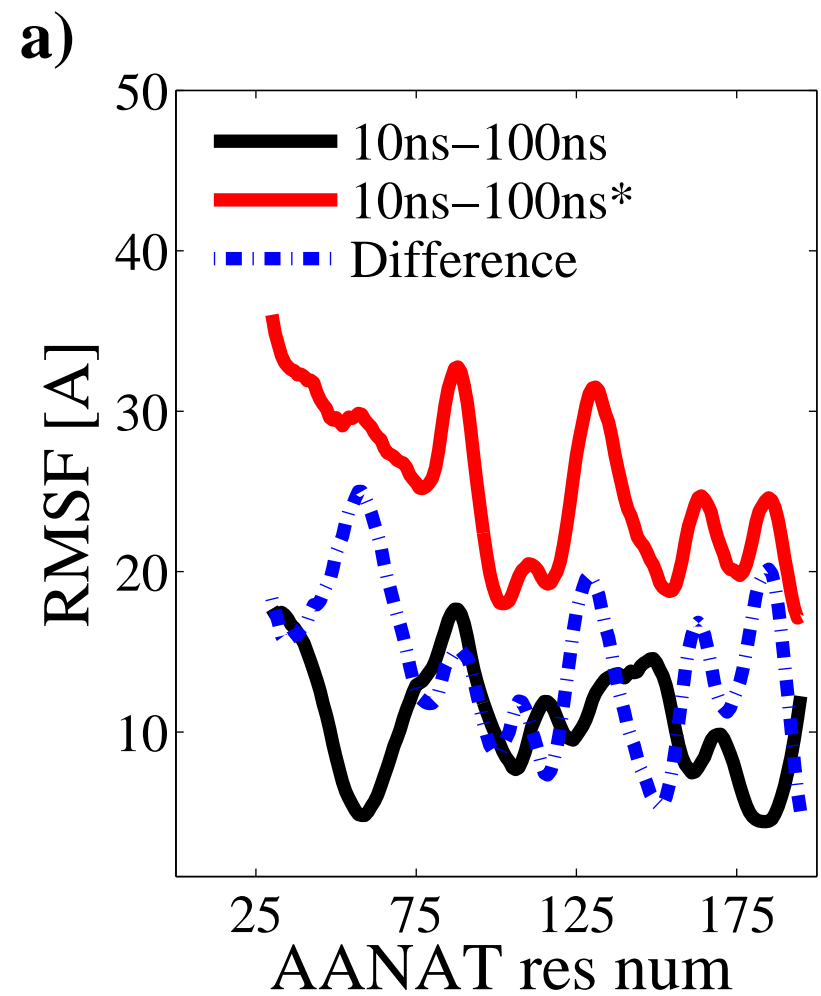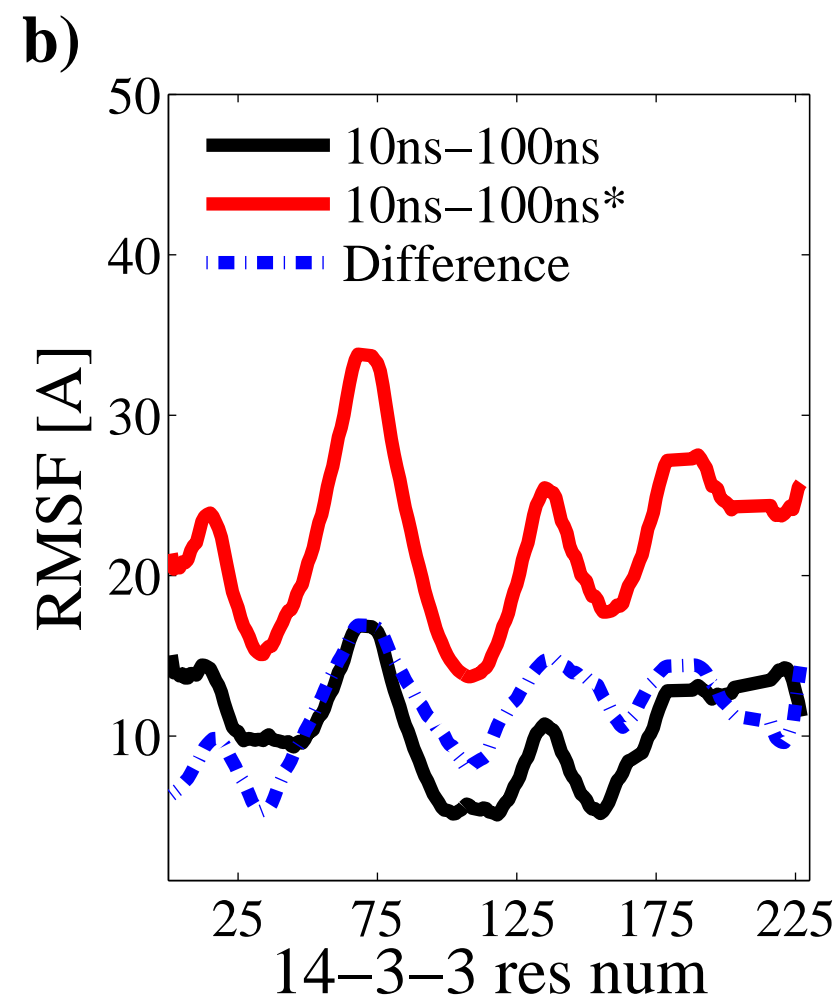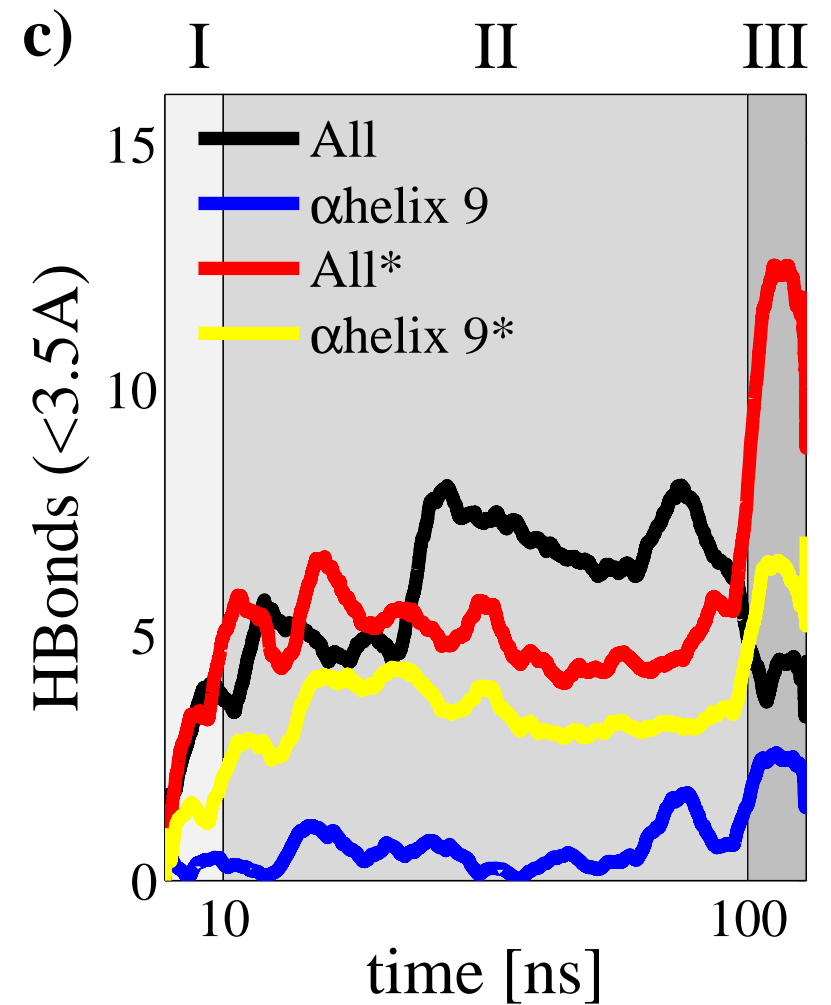

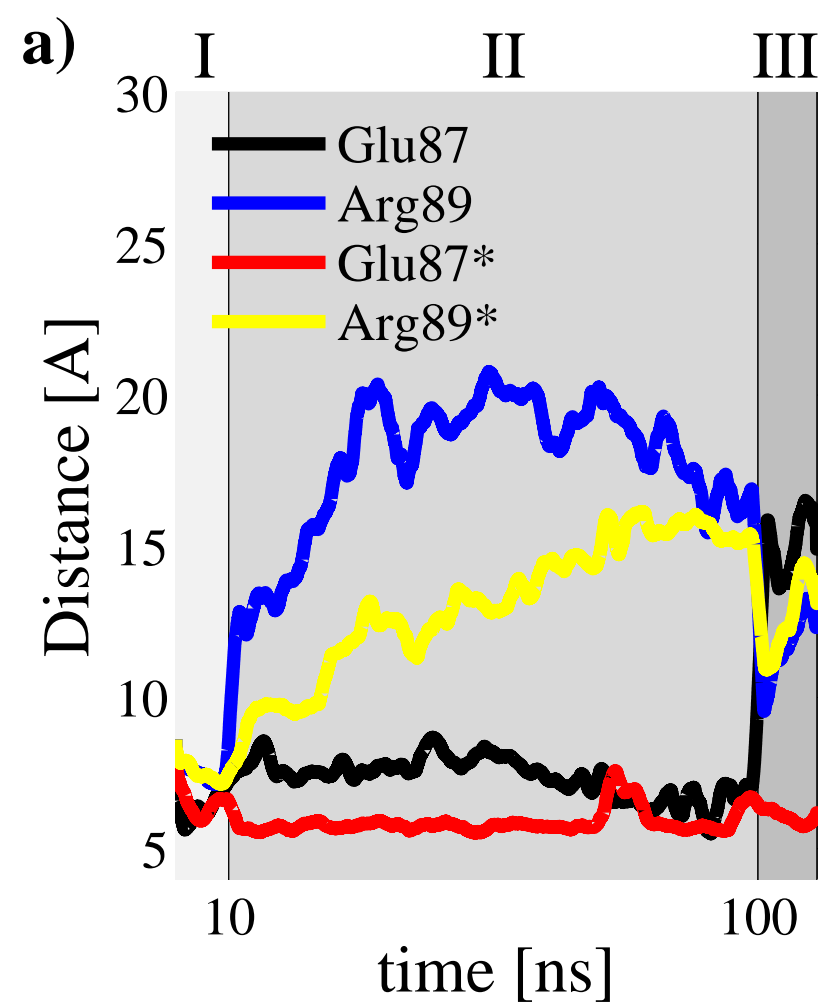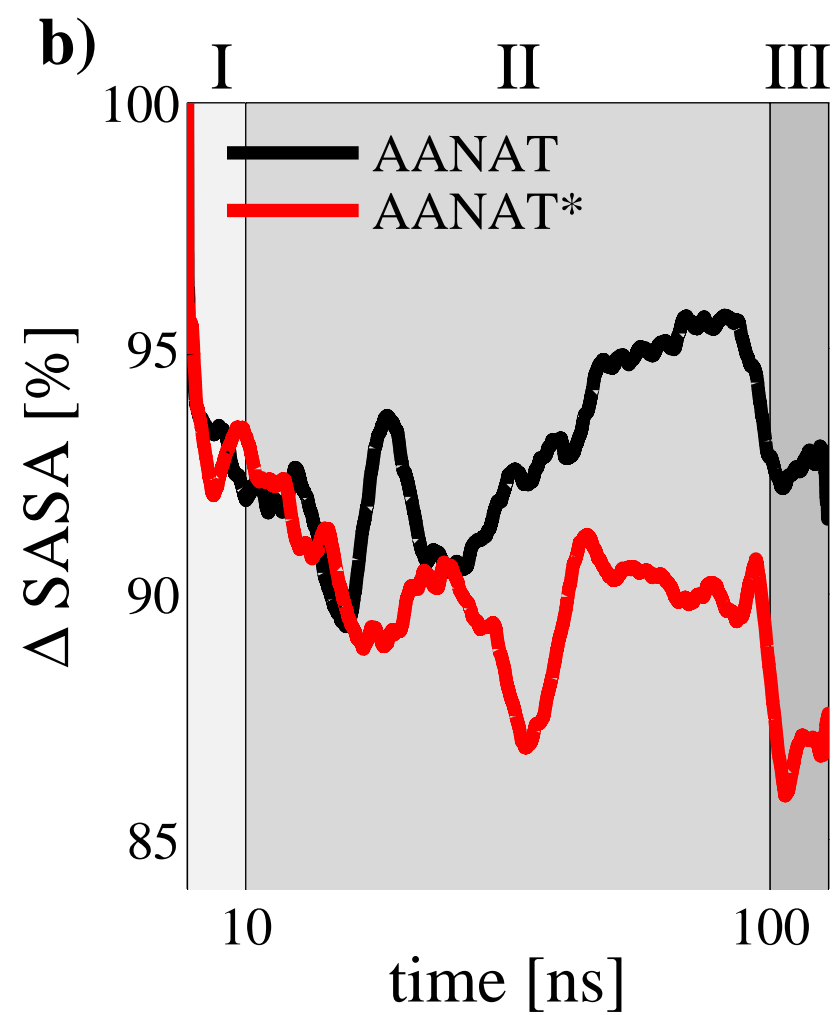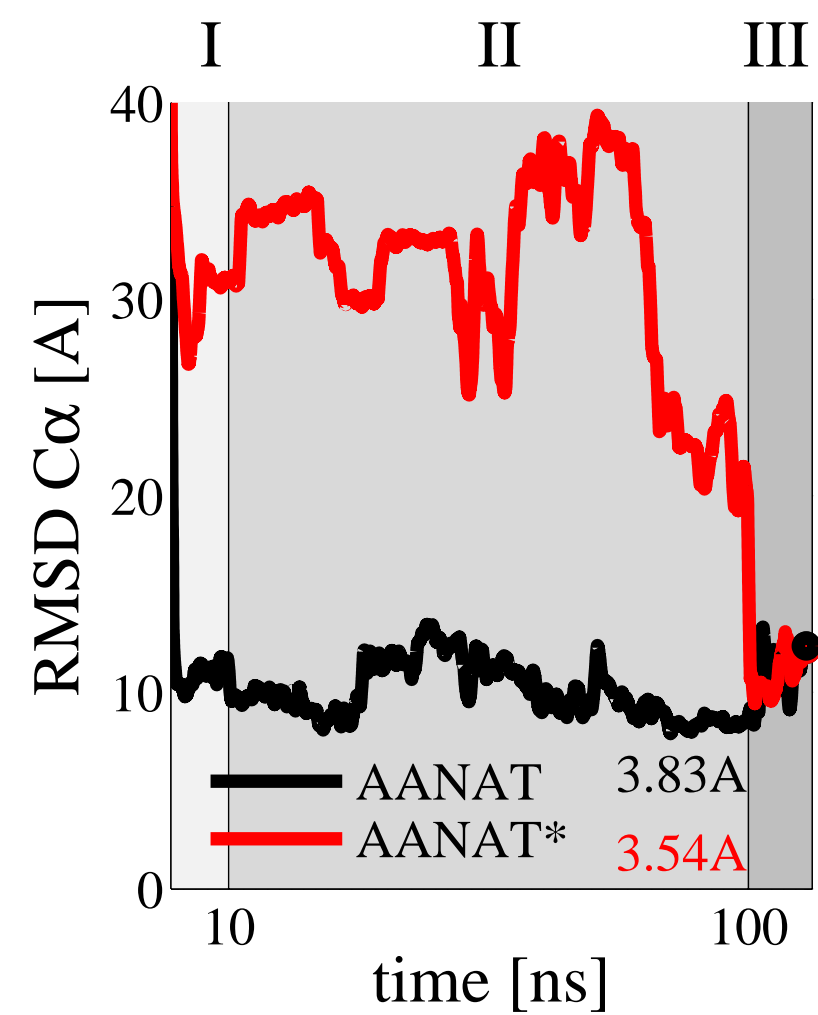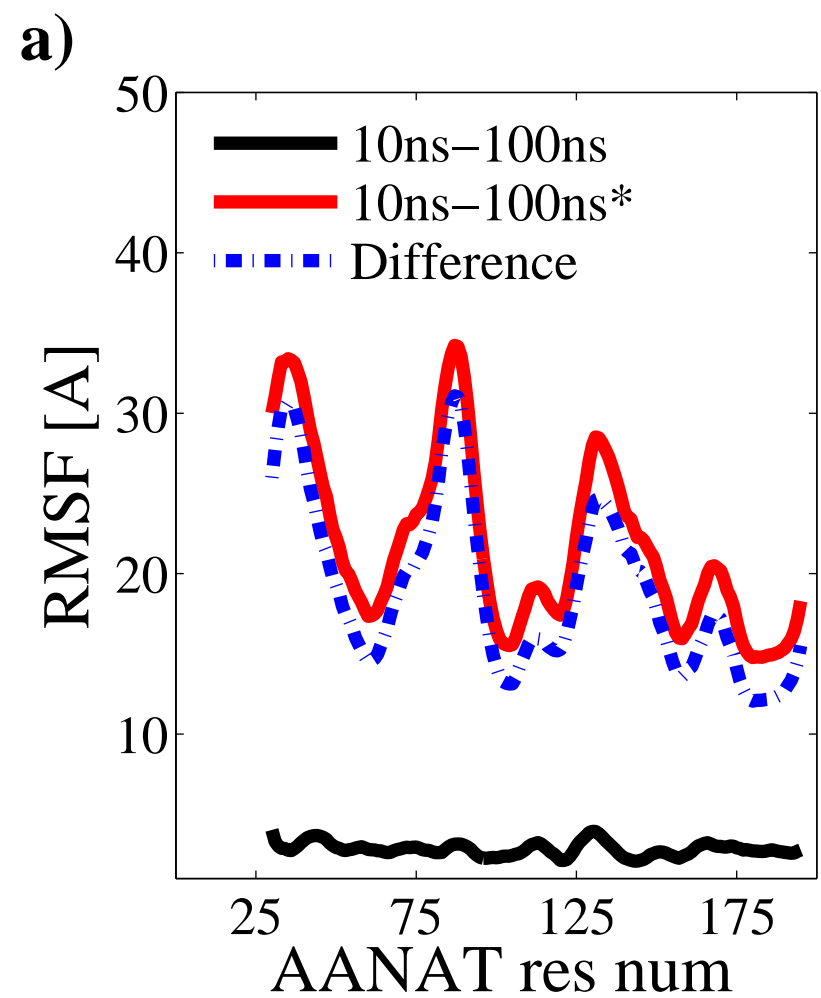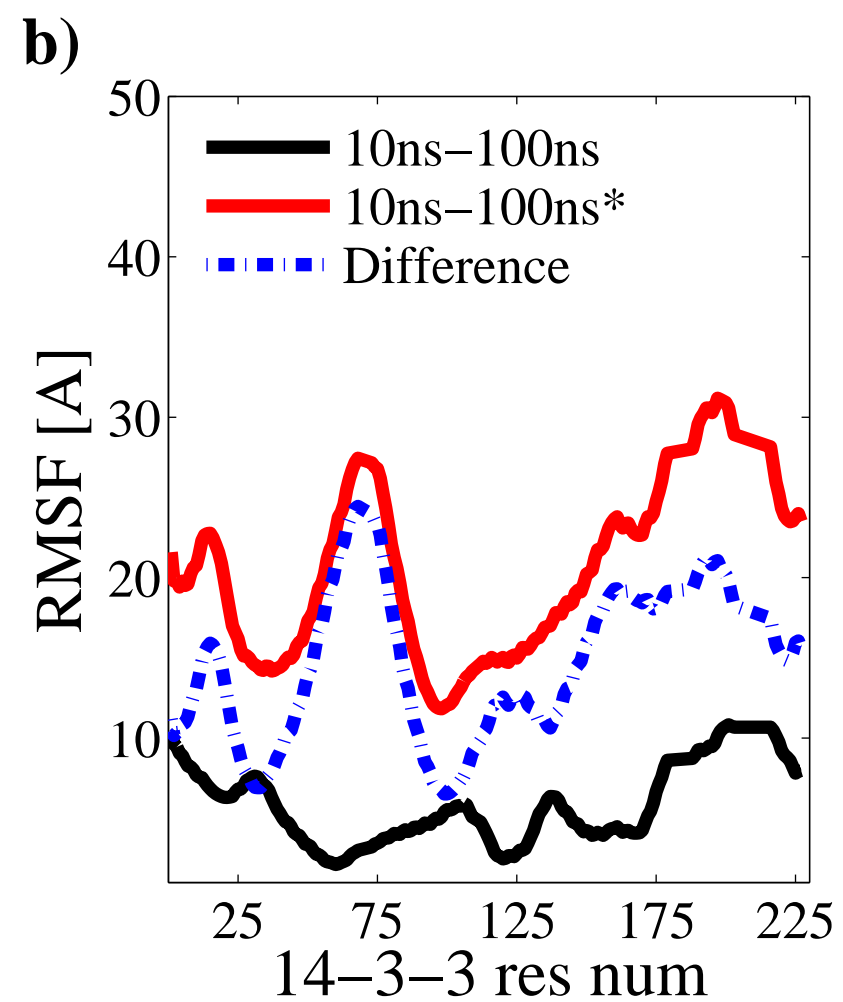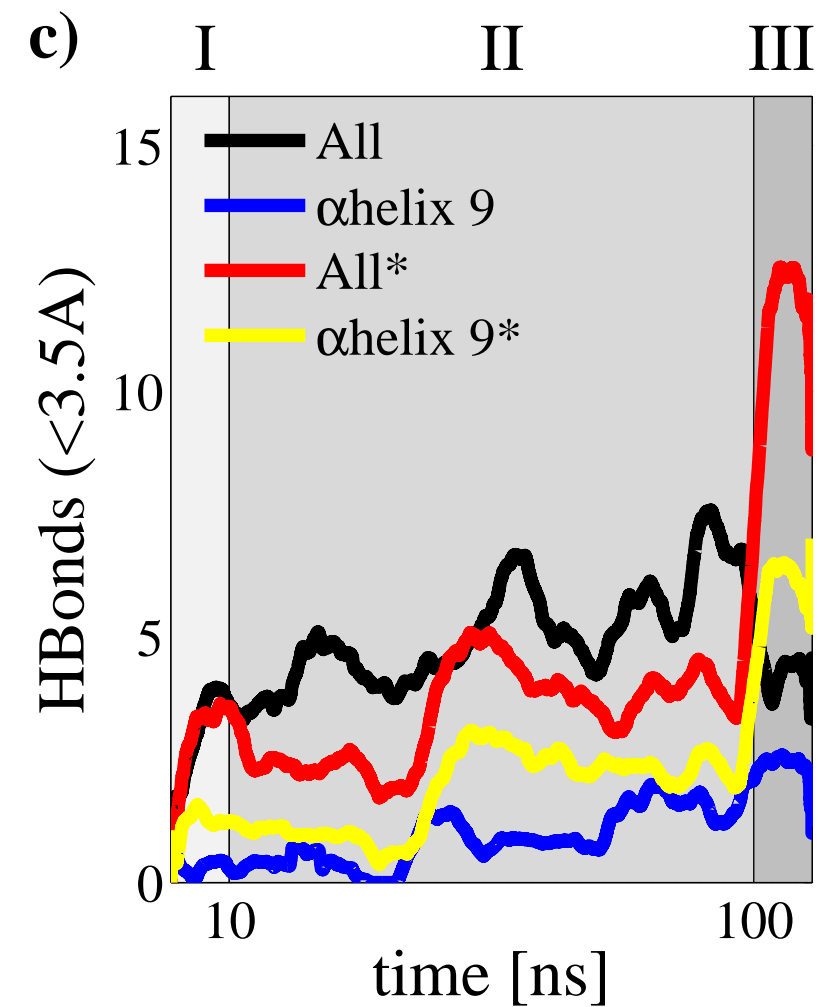

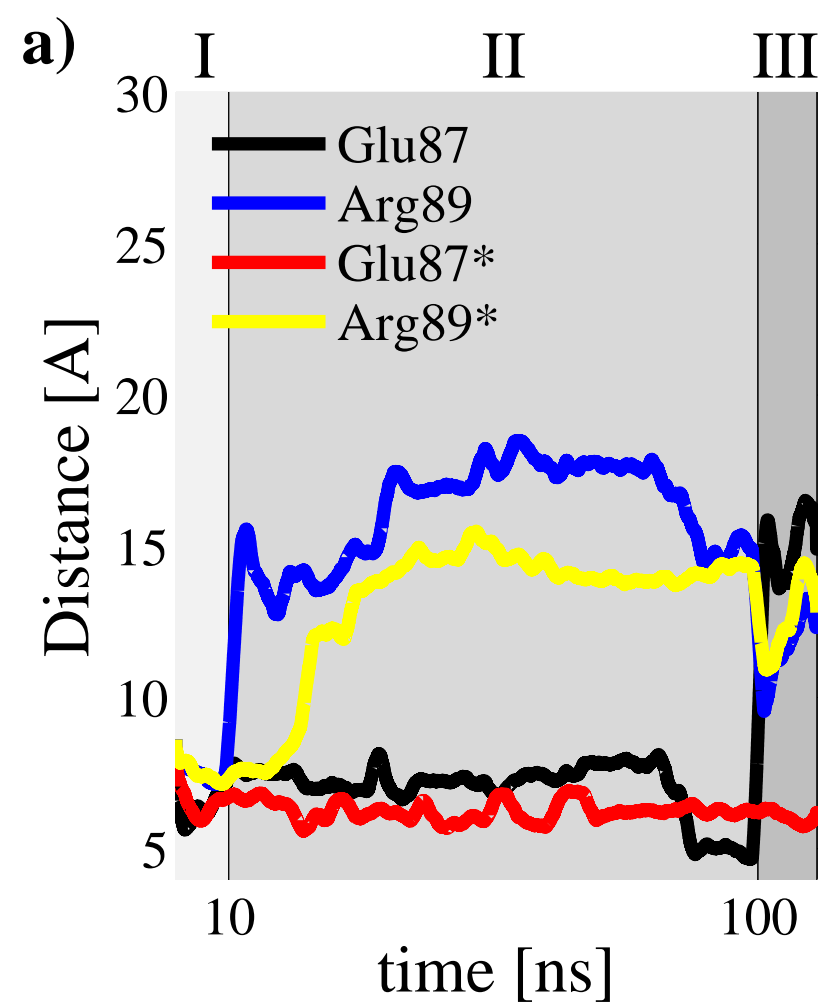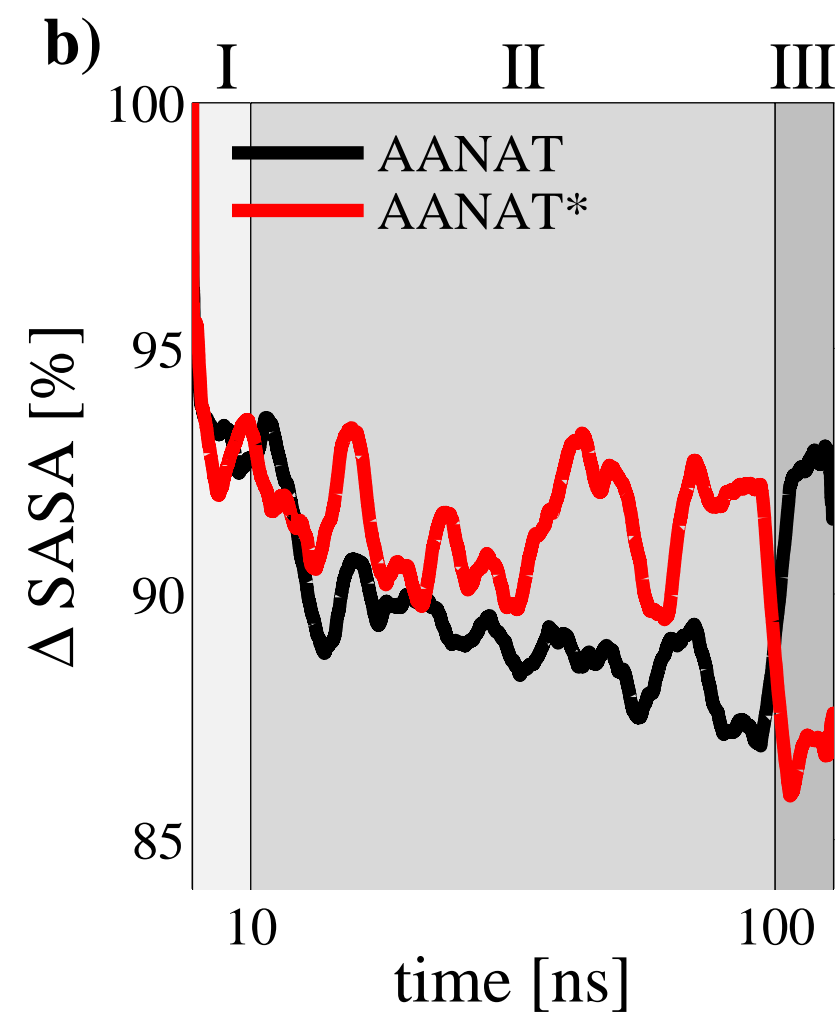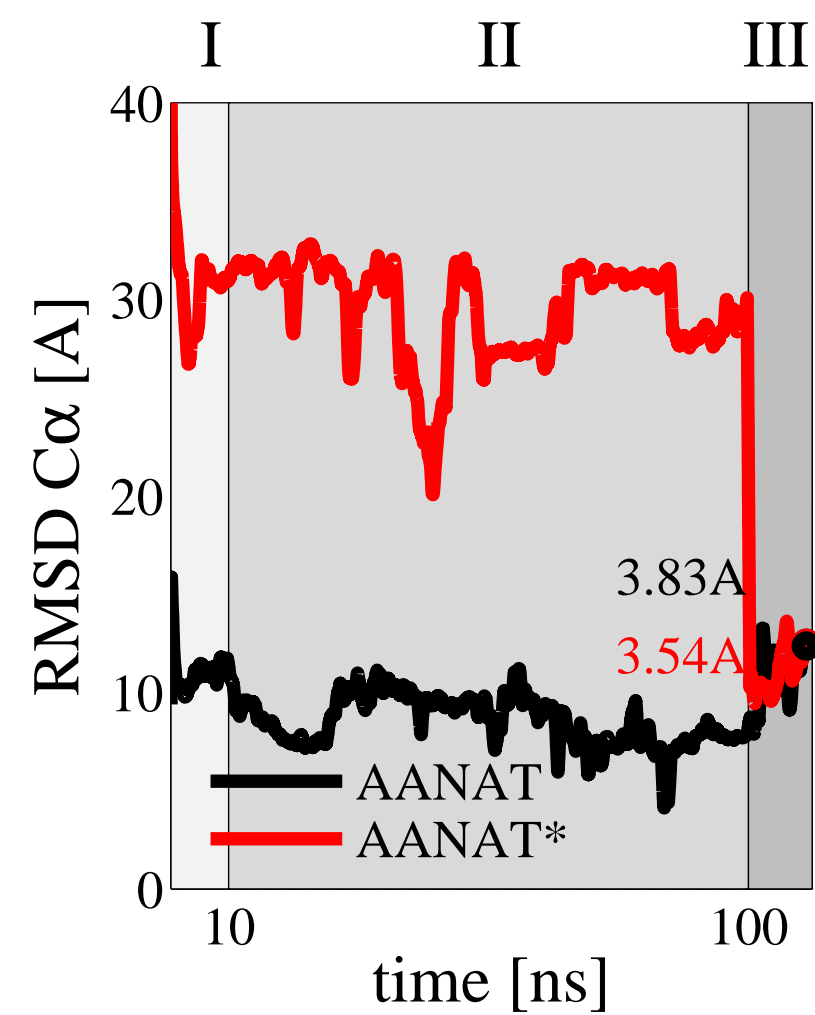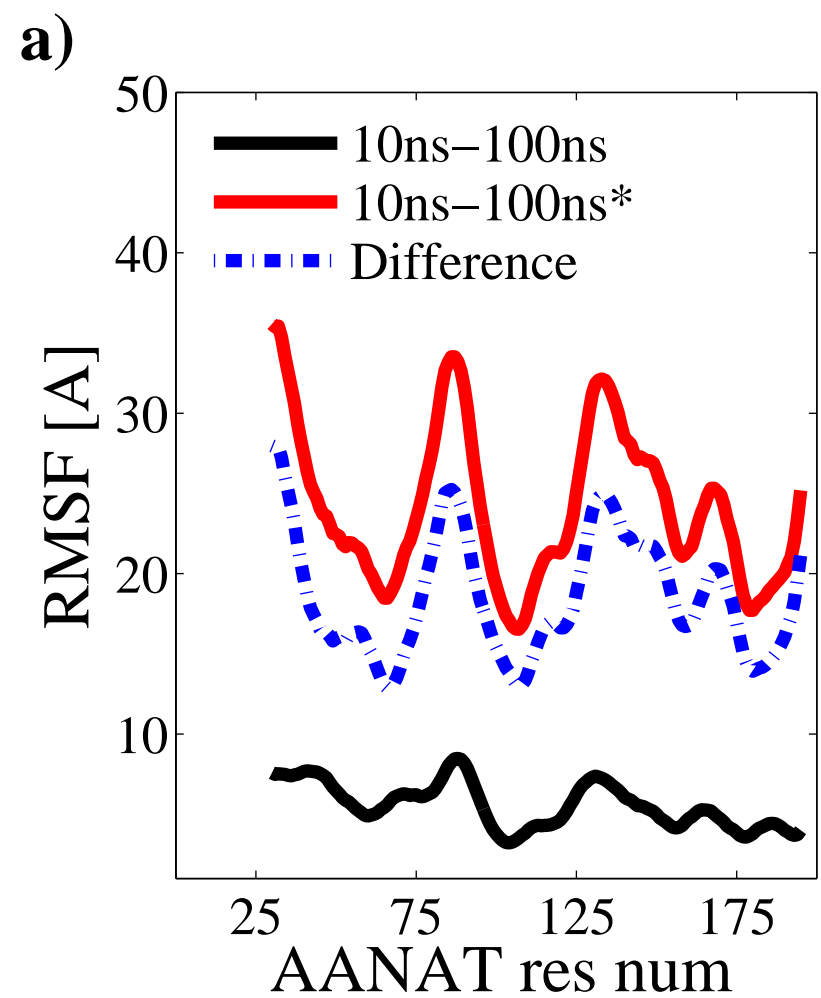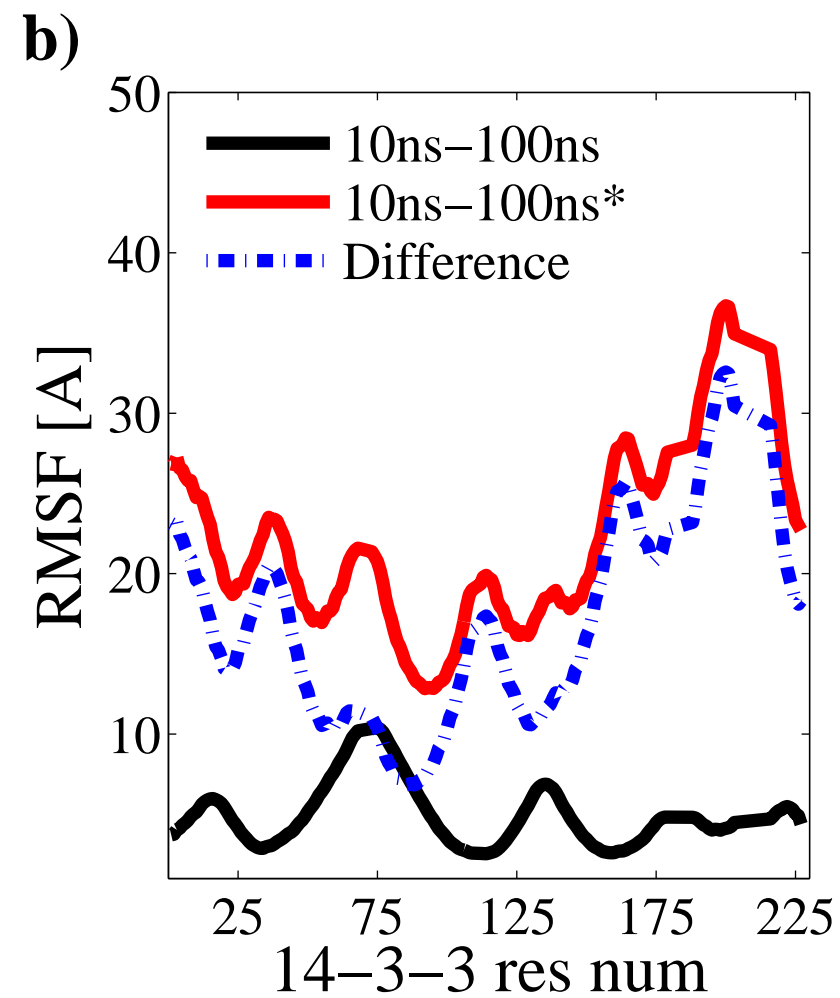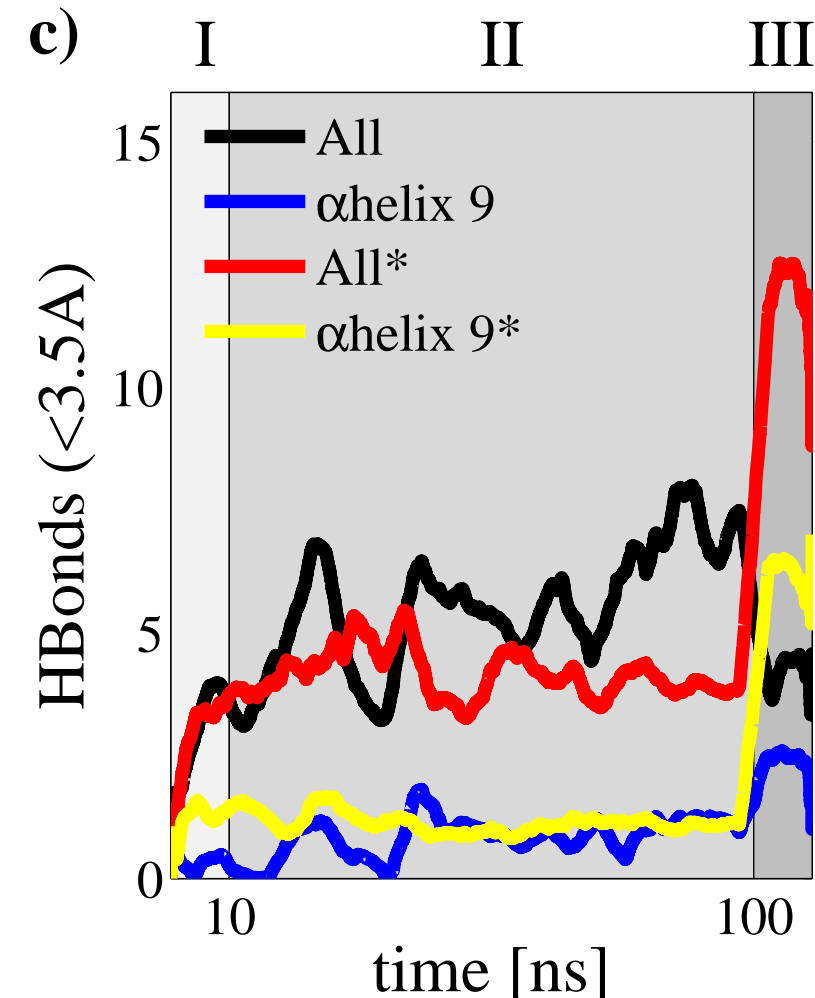

Supplement: srep46114-s1.pdf [file srep46114-s1.pdf]
